# Supplementary material for: Using temperature to modify the reaction conditions and outcomes of polymers formed using transfer-dominated branching radical telomerisation (TBRT)
Source: Royal Society of Chemistry journal article supplement (doi:10.1039/d2ra06578a), 2022-01-01
Supplement: d2ra06578a1.pdf [file d2ra06578a1.pdf]

# Using temperature to modify the reaction conditions and outcomes of polymers formed using Transfer-dominated Branching Radical Telomerisation (TBRT)

Sean Flynn,<sup>[a,b]</sup> Oliver B. Penrhyn-Lowe,<sup>[a,b]</sup> Samuel Mckeating,<sup>[a,b]</sup> Steve Wright,<sup>[a,b]</sup> Sarah Lomas,<sup>[a,b]</sup> Savannah R. Cassin,<sup>[a,b]</sup> Pierre Chambon,<sup>[a,b]</sup> and Steve P. Rannard<sup>\*[a,b]</sup>

[a] Materials Innovation Factory, University of Liverpool, 51 Oxford Street, Liverpool, L7 3NY, UK

[b] Department of Chemistry, University of Liverpool, Crown Street, Liverpool, L69 7ZD, UK

[\*] Corresponding author E-mail: [srannard@liv.ac.uk](mailto:srannard@liv.ac.uk)

## 1. Materials and instrumentation

### 1.1 Materials

1-Dodecanethiol (DDT, 98 %), 2,2'-Azobis(2-methylpropionitrile) (AIBN, 98 %), deuterated chloroform ( $\text{CDCl}_3$ , 99.8 atom % D), ethylene glycol dimethacrylate (EGDMA, 98 %), and ethyl methacrylate (EMA, 99 %) were purchased from Sigma Aldrich. Hexane (analytical grade), methanol (MeOH, analytical grade 99.9 %), tetrahydrofuran (THF, HPLC-grade) and toluene (reagent grade) were purchased from Fisher. All materials were used as received unless otherwise stated.

### 1.2 Instrumentation

$^1\text{H}$  and  $^{13}\text{C}$  experiments were recorded using a Bruker AMX-400 MHz spectrometer;  $^1\text{H}$  and  $^{13}\text{C}$  spectra were recorded at a frequency of 400 and 100 MHz respectively. Samples were analysed in  $\text{CDCl}_3$  at ambient temperature.  $^1\text{H}$  and  $^{13}\text{C}$  chemical shifts ( $\delta$ ) are reported in parts per million (ppm) relative to those of tetramethyl silane (TMS).

All TD-SEC analyses were performed using a Malvern Viscotek instrument using GPCmax VE2001 autosampler, two Viscotek T6000M columns (and a guard column), a refractive index (RI) detector VE3580 and a 270 Dual Detector (light scattering and viscometer) with a mobile phase of THF at 35 °C and a flow-rate of 1 mL min<sup>-1</sup>. All samples were dissolved at 5 mg mL<sup>-1</sup> and passed through a 0.2  $\mu\text{m}$  syringe filter prior to injection (100  $\mu\text{L}$ ). From TD-SEC results, the number-average molecular weight ( $M_n$ ), weight-average molecular weight ( $M_w$ ), polymer dispersity ( $\mathcal{D}$ ), molecular weight distribution and intrinsic viscosity of all polymers were estimated using Omniseq software (version 5.12). Narrow and broad polystyrene standards (Viscotek,  $M_w = 105 \text{ kg mol}^{-1}$ ,  $\mathcal{D} = 1.050$  and  $M_w = 248 \text{ kg mol}^{-1}$ ,  $\mathcal{D} = 2.370$  respectively) were used to validate the instrument operation.

Thermal analyses were conducted using a TA Instruments Discovery DSC 25 instrument equipped with a RCS90 cooling unit. The following thermal protocol was used for all DSC analyses: (1) the sample was heated to 200 °C and subjected to a 3-minute isotherm to erase its thermal history, (2) the sample was then cooled to -90 °C at a rate of -10 °C min<sup>-1</sup> followed by a 30-minute isotherm. (3) glass transition behaviour was then studied during heating of the sample to 150 °C at a rate of 20 °C min<sup>-1</sup>. Glass transition temperatures ( $T_g$ ) were recorded using TA Instruments software, TRIOS.

## 2. Experimental

### 2.1 *Determination of ethyl methacrylate free radical polymerisation kinetics*

Ethyl methacrylate (20.0 g, 0.175 mol), AIBN (0.287 g, 1.75 mmol) and toluene (20.0 g, 50 wt % solids) were added to a round-bottom flask equipped with a magnetic stirrer bar. The solution was deoxygenated *via*  $\text{N}_2$  bubbling for 30 minutes following which an aliquot was taken to aid determination of vinyl conversion *via*  $^1\text{H}$  NMR spectroscopy. Samples of the mixture (*ca.* 10 mL) were transferred to individual round-bottom flasks under a  $\text{N}_2$  atmosphere and were then purged for a further 10 minutes. Reactions were sealed and placed in separate oil baths operating at 70, 80, 90 and 100 °C. Aliquots of the reaction mixtures (~100  $\mu\text{L}$ ) were taken at predetermined time intervals for determination of vinyl conversion by  $^1\text{H}$  NMR spectroscopy. Monomer conversions were determined *via* comparison of the integrations of chemical shifts attributed to the vinylic and methylene groups

of EMA, located at 6.10 and 4.21 ppm respectively. Crude reaction mixtures were diluted in acetone and polymers were purified *via* precipitation into hexane at ambient temperature. Polymers were dried over 48 hours *in vacuo* at 40 °C to give *p*(EMA) as a white powder.

## 2.2 **Determination of DDT chain transfer coefficients ( $C_T$ ) during free radical polymerisation of EMA at varied temperature**

Chain transfer coefficients ( $C_T$ ) for the free radical polymerisation of EMA in the presence of DDT were obtained *via* the Mayo method;<sup>[1]</sup> polymerisations were conducted using targeted initial molar ratios of EMA to DDT ( $[EMA]_0/[DDT]_0$ ) of 100, 150, 200, 250, 300, 350, 400, 450 and 500. In a typical Mayo experiment, targeting an  $[EMA]_0/[DDT]_0$  ratio of 100, EMA (20.0 g, 0.175 mol), DDT (355 mg, 1.75 mmol), AIBN (0.287 g, 1.75 mmol) and toluene (20.0 g, 50 wt % solids) were added to a round-bottom flask equipped with a magnetic stirrer bar. The solution was deoxygenated *via*  $N_2$  bubbling for 30 minutes. Samples of the mixture (*ca.* 10 mL) were transferred to individual round-bottom flasks under a  $N_2$  atmosphere and were then purged for a further 10 minutes. Reactions were sealed and placed in separate oil baths operating at 70, 80, 90 and 100 °C. Polymerisations were quenched *via* rapid addition to an ice bath; this was done at time intervals that ensured monomer conversions remained below 5%. Aliquots of reaction mixtures (~100  $\mu$ L) were taken for determination of vinyl group conversion by  $^1H$  NMR spectroscopy. Crude reaction mixtures were purified *via* precipitation into hexane at ambient temperature. Polymers were dried over 48 hours *in vacuo* at 40 °C to give *p*(EMA) as a white powder. Molecular weight distributions of crude and purified *p*(EMA) samples were obtained using TD-SEC.  $C_T$  values were determined *via* construction and interpretation of Mayo plots.

## 2.3 **Kinetic studies on the TBRT of EGDMA conducted at varied temperature**

TBRT kinetic studies were conducted targeting an initial molar ratio of 0.850 equivalents of EGDMA per DDT ( $[EGDMA]_0/[DDT]_0 = 0.850$ ). EGDMA (20.00 g, 101 mmol), DDT (24.02 g, 119 mmol), AIBN (332 mg, 2.02 mmol), toluene (34.02 g, 39.23 mL) and anisole (*ca.* 0.5 mL) were added to a round-bottom flask equipped with a magnetic stirrer bar. The solution was deoxygenated *via*  $N_2$  bubbling for 30 minutes following which an aliquot was taken for determination of  $[EGDMA]_0/[DDT]_0$  by  $^1H$  NMR analysis. Aliquots of the mixture (*ca.* 15 mL) were transferred to individual round-bottom flasks under a  $N_2$  atmosphere and were then purged for a further 10 minutes *via*  $N_2$  bubbling. The flasks were sealed and placed in separate oil baths at 70, 80, 90 and 100 °C. Aliquots of reaction mixtures (~200  $\mu$ L) were taken at predetermined time intervals for determination of vinyl and telogen (DDT) conversions using  $^1H$  NMR spectroscopy and GC respectively. Monomer conversions were determined *via* comparison of the integrations of chemical shifts attributed to the vinylic and methylene groups of EGDMA, located at 6.10 and 4.21 ppm respectively. DDT conversions were determined *via* gas chromatography using anisole as an internal standard. TBRTs were stopped at high vinyl conversion (>99 %) by cooling to ambient temperature and exposure to air. An aliquot (~100  $\mu$ L) of the reaction mixture was taken for determination of final monomer conversion *via*  $^1H$  NMR analysis. Branched polymers were purified *via* precipitation from THF into methanol at ambient temperature and dried *in vacuo* at 40 °C for 48 hours. The purified samples were characterised using  $^1H$  NMR spectroscopy and TD-SEC to determine final molar ratios of EGDMA and DDT structural subunits ( $[EGDMA]_f/[DDT]_f$ ) and polymer molecular weights.

## 2.4 Synthesis of hyper-branched polymers via TBRT at varied temperature

In a typical TBRT targeting an initial ratio of 0.850 equivalents of EGDMA per DDT ( $[EGDMA]_0/[DDT]_0 = 0.850$ ). EGDMA (10.00 g, 50.5 mmol), DDT (12.01 g, 59.4 mmol), AIBN (166 mg, 1.51 mmol) and toluene (22.18 g, 25.58 mL) were added to a round-bottom flask equipped with a magnetic stirrer bar. The solution was deoxygenated *via* N<sub>2</sub> bubbling for 30 minutes following which an aliquot was taken for accurate determination of  $[EGDMA]_0/[DDT]_0$  by <sup>1</sup>H NMR analysis. Aliquots of the mixture (*ca.* 10 mL) were transferred to individual round-bottom flasks under a N<sub>2</sub> atmosphere and were then purged for a further 10 minutes *via* additional N<sub>2</sub> bubbling. The flasks were sealed and placed in separate oil baths at 70 °C, 80 °C, 90 °C and 100 °C. TBRTs were stopped after 24 hours by cooling the reaction to ambient temperature and exposure to air. Aliquots (~100 μL) of the reaction mixture was taken for determination of monomer conversion *via* <sup>1</sup>H NMR analysis. Hyper-branched polymers were purified *via* precipitation from THF into methanol at ambient temperature and dried *in vacuo* at 40 °C for 48 hours. Hyper-branched polymers were characterised using <sup>1</sup>H NMR spectroscopy and TD-SEC to determine the final molar ratios of EGDMA and DDT structural subunits ( $[EGDMA]_f/[DDT]_f$ ) and polymer molecular weights.

## 3. Supplementary figures, tables and equations

**Table S1** <sup>1</sup>H NMR and TD-SEC analysis of *p*(EMA) homopolymers generated at low conversion using varying initial molar ratios of DDT to EMA ( $[DDT]_0/[EMA]_0$ ).

| Entry | Temp. (°C) | $[DDT]_0/[EMA]_0$ | $[EMA]_0/[DDT]_0$ | <sup>1</sup> H NMR (CDCl <sub>3</sub> ) | TD-SEC (THF) <sup>b</sup>             |                                       |      |                 |                   |
|-------|------------|-------------------|-------------------|-----------------------------------------|---------------------------------------|---------------------------------------|------|-----------------|-------------------|
|       |            |                   |                   | Conv. (%) <sup>a</sup>                  | M <sub>w</sub> (g mol <sup>-1</sup> ) | M <sub>n</sub> (g mol <sup>-1</sup> ) | Đ    | DP <sub>n</sub> | 1/DP <sub>n</sub> |
| 1     | 70 °C      | 0.0067            | 150               | 3                                       | 28,315                                | 18,625                                | 1.52 | 163             | 0.00613           |
| 2     |            | 0.0050            | 200               | 3                                       | 33,280                                | 21,190                                | 1.57 | 186             | 0.00539           |
| 3     |            | 0.0040            | 250               | 4                                       | 41,270                                | 25,510                                | 1.62 | 223             | 0.00447           |
| 4     |            | 0.0033            | 300               | 5                                       | 43,470                                | 27,225                                | 1.60 | 239             | 0.00419           |
| 5     |            | 0.0029            | 350               | 3                                       | 29,735                                | 29,735                                | 1.65 | 261             | 0.00384           |
| 6     |            | 0.0025            | 400               | 4                                       | 53,665                                | 32,130                                | 1.67 | 281             | 0.00355           |
| 7     |            | 0.0022            | 450               | 3                                       | 59,850                                | 33,515                                | 1.79 | 294             | 0.00341           |
| 8     |            | 0.0020            | 500               | 5                                       | 71,570                                | 35,750                                | 2.00 | 313             | 0.00319           |
| 9     | 80 °C      | 0.0067            | 150               | 5                                       | 26,000                                | 17,530                                | 1.48 | 154             | 0.00651           |
| 10    |            | 0.0050            | 200               | 5                                       | 31,165                                | 19,950                                | 1.56 | 175             | 0.00572           |
| 11    |            | 0.0040            | 250               | 5                                       | 39,995                                | 24,055                                | 1.66 | 211             | 0.00474           |
| 12    |            | 0.0033            | 300               | 5                                       | 42,000                                | 26,235                                | 1.60 | 230             | 0.00435           |
| 13    |            | 0.0029            | 350               | 3                                       | 43,595                                | 27,630                                | 1.58 | 242             | 0.00413           |
| 14    |            | 0.0025            | 400               | 5                                       | 51,800                                | 30,670                                | 1.69 | 269             | 0.00372           |
| 15    |            | 0.0022            | 450               | 5                                       | 63,300                                | 34,305                                | 1.85 | 301             | 0.00333           |
| 16    |            | 0.0020            | 500               | 5                                       | 71,020                                | 35,135                                | 2.02 | 308             | 0.00325           |

<sup>a</sup>Determined by <sup>1</sup>H NMR analysis of the reaction mixture following cessation of the polymerisation. <sup>b</sup>Determined by TD-SEC analysis of purified polymers.

**Table S1 (continued)** <sup>1</sup>H NMR and TD-SEC analysis of *p*(EMA) homopolymers generated at low conversion using varying initial molar ratios of DDT to EMA ([DDT]<sub>0</sub>/[EMA]<sub>0</sub>).

| Entry | Temp. (°C) | [DDT] <sub>0</sub> /[EMA] <sub>0</sub> | [EMA] <sub>0</sub> /[DDT] <sub>0</sub> | <sup>1</sup> H NMR   | TD-SEC                                |                                       |      |                 |                   |
|-------|------------|----------------------------------------|----------------------------------------|----------------------|---------------------------------------|---------------------------------------|------|-----------------|-------------------|
|       |            |                                        |                                        | (CDCl <sub>3</sub> ) | (THF)                                 |                                       |      |                 |                   |
|       |            |                                        |                                        | Conv. (%)            | M <sub>w</sub> (g mol <sup>-1</sup> ) | M <sub>n</sub> (g mol <sup>-1</sup> ) | Đ    | DP <sub>n</sub> | 1/DP <sub>n</sub> |
| 17    | 90°C       | 0.0067                                 | 150                                    | 4                    | 27,425                                | 16,874                                | 1.63 | 148             | 0.00676           |
| 18    |            | 0.0050                                 | 200                                    | 4                    | 33,040                                | 20,390                                | 1.62 | 179             | 0.00560           |
| 19    |            | 0.0040                                 | 250                                    | 3                    | 44,120                                | 24,689                                | 1.79 | 216             | 0.00462           |
| 20    |            | 0.0033                                 | 300                                    | 4                    | 50,990                                | 27,265                                | 1.87 | 239             | 0.00419           |
| 21    |            | 0.0029                                 | 350                                    | 5                    | 56,250                                | 30,222                                | 1.86 | 265             | 0.00378           |
| 22    |            | 0.0025                                 | 400                                    | 3                    | 64,695                                | 31,751                                | 2.04 | 278             | 0.00359           |
| 23    |            | 0.0022                                 | 450                                    | 3                    | 70,010                                | 32,167                                | 2.18 | 282             | 0.00355           |
| 24    |            | 0.0020                                 | 500                                    | 4                    | 78,065                                | 35,397                                | 2.21 | 310             | 0.00322           |
| 25    | 100°C      | 0.0067                                 | 150                                    | 3                    | 28,795                                | 18,290                                | 1.58 | 160             | 0.00624           |
| 26    |            | 0.0050                                 | 200                                    | 4                    | 42,635                                | 24,175                                | 1.77 | 212             | 0.00472           |
| 27    |            | 0.0040                                 | 250                                    | 4                    | 52,310                                | 29,695                                | 1.76 | 260             | 0.00384           |
| 28    |            | 0.0033                                 | 300                                    | 4                    | 61,885                                | 35,530                                | 1.74 | 311             | 0.00321           |
| 29    |            | 0.0029                                 | 350                                    | 5                    | 68,215                                | 39,220                                | 1.74 | 344             | 0.00291           |
| 30    |            | 0.0025                                 | 400                                    | 3                    | 75,580                                | 41,465                                | 1.82 | 363             | 0.00275           |
| 31    |            | 0.0022                                 | 450                                    | 5                    | 82,125                                | 43,520                                | 1.89 | 381             | 0.00262           |
| 32    |            | 0.0020                                 | 500                                    | 5                    | 100,170                               | 49,635                                | 2.02 | 435             | 0.00230           |

<sup>a</sup>Determined by <sup>1</sup>H NMR analysis of the reaction mixture following cessation of the polymerisation. <sup>b</sup>Determined by TD-SEC analysis of purified polymers.

**Figure S1** The impact of temperature on FRP kinetics. a) Schematic representation of the FRP of EMA. B) Kinetic plots obtained from the FRP of EMA at 70 (red circles), 80 (green squares), 90 (blue diamonds) and 100 °C (purple triangles). (i) monitoring of vinyl conversion over time and (ii) construction of first-order semi-logarithmic kinetic plots.

**Table S2**<sup>1</sup>H NMR spectroscopic analysis of EMA polymerisation kinetics at varied temperature.

| Entry | Temp. (°C) | Time (mins) | <sup>1</sup> H NMR (CDCl <sub>3</sub> ) |                       |                         |
|-------|------------|-------------|-----------------------------------------|-----------------------|-------------------------|
|       |            |             | Vinyl Conv. (%) <sup>a</sup>            | [M] <sub>0</sub> /[M] | ln[M] <sub>0</sub> /[M] |
| 1     | 70 °C      | 5           | 1                                       | 1.01                  | 0.01                    |
| 2     |            | 10          | 6                                       | 1.06                  | 0.06                    |
| 3     |            | 15          | 10                                      | 1.10                  | 0.10                    |
| 4     |            | 20          | 13                                      | 1.15                  | 0.14                    |
| 5     |            | 25          | 16                                      | 1.19                  | 0.17                    |
| 6     |            | 30          | 20                                      | 1.25                  | 0.22                    |
| 7     |            | 40          | 25                                      | 1.34                  | 0.29                    |
| 8     |            | 50          | 31                                      | 1.44                  | 0.37                    |
| 9     |            | 60          | 37                                      | 1.58                  | 0.46                    |
| 10    |            | 75          | 44                                      | 1.80                  | 0.59                    |
| 11    |            | 90          | 51                                      | 2.02                  | 0.71                    |
| 12    |            | 120         | 62                                      | 2.64                  | 0.97                    |
| 13    | 80 °C      | 5           | 7                                       | 1.08                  | 0.08                    |
| 14    |            | 10          | 17                                      | 1.20                  | 0.19                    |
| 15    |            | 15          | 27                                      | 1.36                  | 0.31                    |
| 16    |            | 20          | 36                                      | 1.56                  | 0.44                    |
| 17    |            | 25          | 42                                      | 1.73                  | 0.55                    |
| 18    |            | 30          | 47                                      | 1.88                  | 0.63                    |
| 19    |            | 40          | 56                                      | 2.28                  | 0.82                    |
| 20    |            | 50          | 63                                      | 2.73                  | 1.01                    |
| 21    |            | 60          | 70                                      | 3.33                  | 1.20                    |
| 22    |            | 75          | 78                                      | 4.48                  | 1.50                    |
| 23    |            | 90          | 83                                      | 5.85                  | 1.77                    |
| 24    |            | 120         | 92                                      | 13.16                 | 2.58                    |
| 25    | 90 °C      | 5           | 1                                       | 1.01                  | 0.01                    |
| 26    |            | 10          | 6                                       | 1.06                  | 0.06                    |
| 27    |            | 15          | 10                                      | 1.10                  | 0.10                    |
| 28    |            | 20          | 13                                      | 1.15                  | 0.14                    |
| 29    |            | 25          | 16                                      | 1.19                  | 0.17                    |
| 30    |            | 30          | 20                                      | 1.25                  | 0.22                    |
| 31    |            | 40          | 25                                      | 1.34                  | 0.29                    |
| 32    |            | 50          | 31                                      | 1.44                  | 0.37                    |
| 33    |            | 60          | 37                                      | 1.58                  | 0.46                    |
| 34    |            | 75          | 44                                      | 1.80                  | 0.59                    |
| 35    |            | 90          | 51                                      | 2.02                  | 0.71                    |
| 36    |            | 120         | 62                                      | 2.64                  | 0.97                    |

**Table S2 (continued)**  $^1\text{H}$  NMR spectroscopic analysis of EMA polymerisation kinetics at varied temperature.

| Entry | Temp. (°C) | Time (mins) | $^1\text{H}$ NMR ( $\text{CDCl}_3$ ) |                           |                              |
|-------|------------|-------------|--------------------------------------|---------------------------|------------------------------|
|       |            |             | Vinyl Conv. (%) <sup>a</sup>         | $[\text{M}]_0/[\text{M}]$ | $\ln[\text{M}]_0/[\text{M}]$ |
| 37    |            | 5           | 7                                    | 1.08                      | 0.08                         |
| 38    |            | 10          | 17                                   | 1.20                      | 0.19                         |
| 39    |            | 15          | 27                                   | 1.36                      | 0.31                         |
| 40    |            | 20          | 36                                   | 1.56                      | 0.44                         |
| 41    |            | 25          | 42                                   | 1.73                      | 0.55                         |
| 42    | 100 °C     | 30          | 47                                   | 1.88                      | 0.63                         |
| 43    |            | 40          | 56                                   | 2.28                      | 0.82                         |
| 44    |            | 50          | 63                                   | 2.73                      | 1.01                         |
| 45    |            | 60          | 70                                   | 3.33                      | 1.20                         |
| 46    |            | 75          | 78                                   | 4.48                      | 1.50                         |
| 47    |            | 90          | 83                                   | 5.85                      | 1.77                         |
| 48    |            | 120         | 92                                   | 13.16                     | 2.58                         |

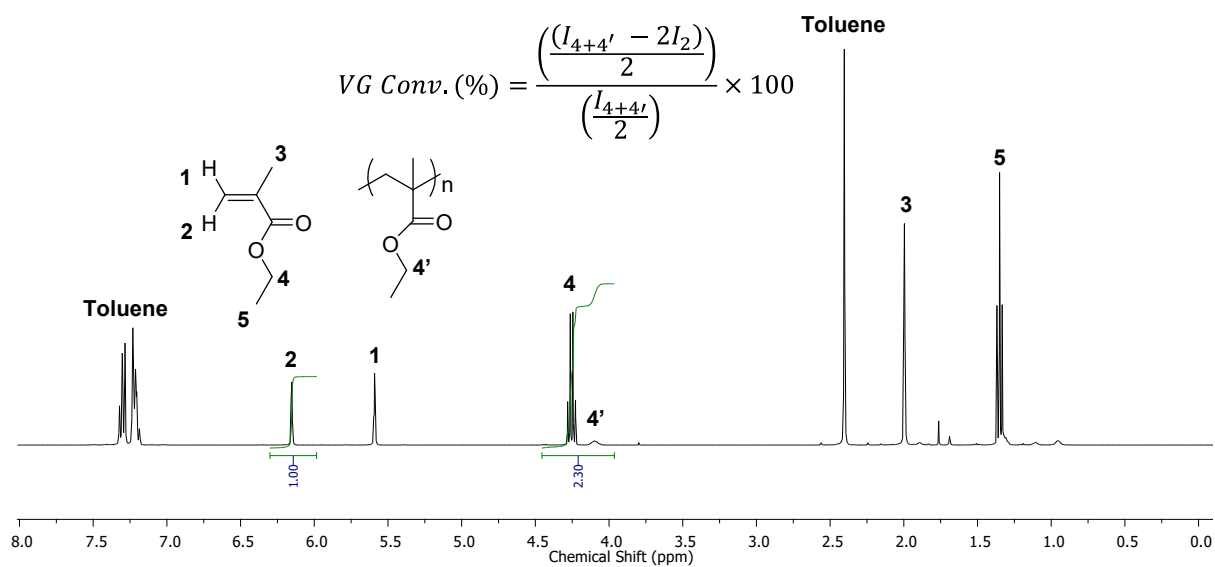

**Figure S2** Exemplary determination of vinyl group (VG) conversion by  $^1\text{H}$  NMR spectroscopy (400 MHz,  $\text{CDCl}_3$ ).  $^1\text{H}$  NMR spectrum obtained from the FRP of EMA in toluene (50 wt %) at 70 °C after 20 minutes. The equation provided was used to determine vinyl group conversion (13%).

$$\frac{1}{DP} = \frac{1}{DP_0} + C_T \left( \frac{[S]_0}{[M]_0} \right)$$

**Equation S1**

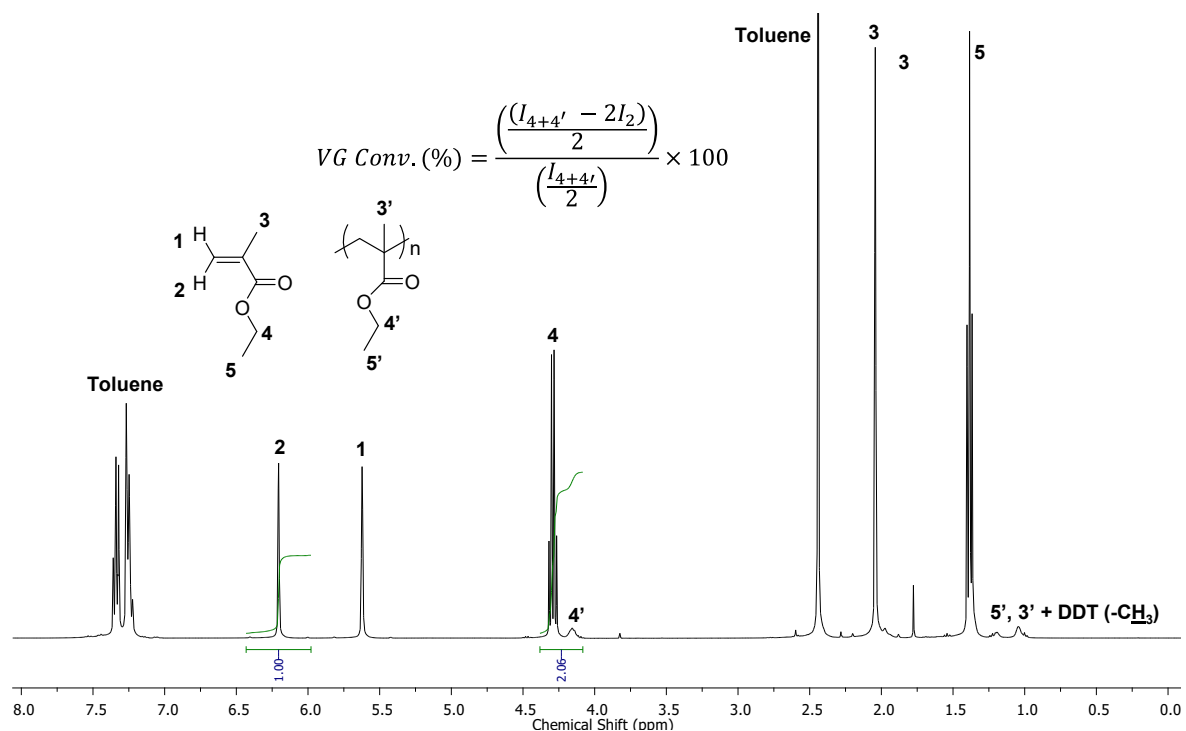

**Figure S3** Exemplary determination of vinyl group (VG) conversion by  $^1\text{H}$  NMR spectroscopy (400 MHz,  $\text{CDCl}_3$ ).  $^1\text{H}$  NMR spectrum obtained from the FRP of EMA in the presence of 1-dodecane thiol (DDT) at  $70^\circ\text{C}$  in toluene (50 wt %). The equation provided was used to determine vinyl group conversion (3%).

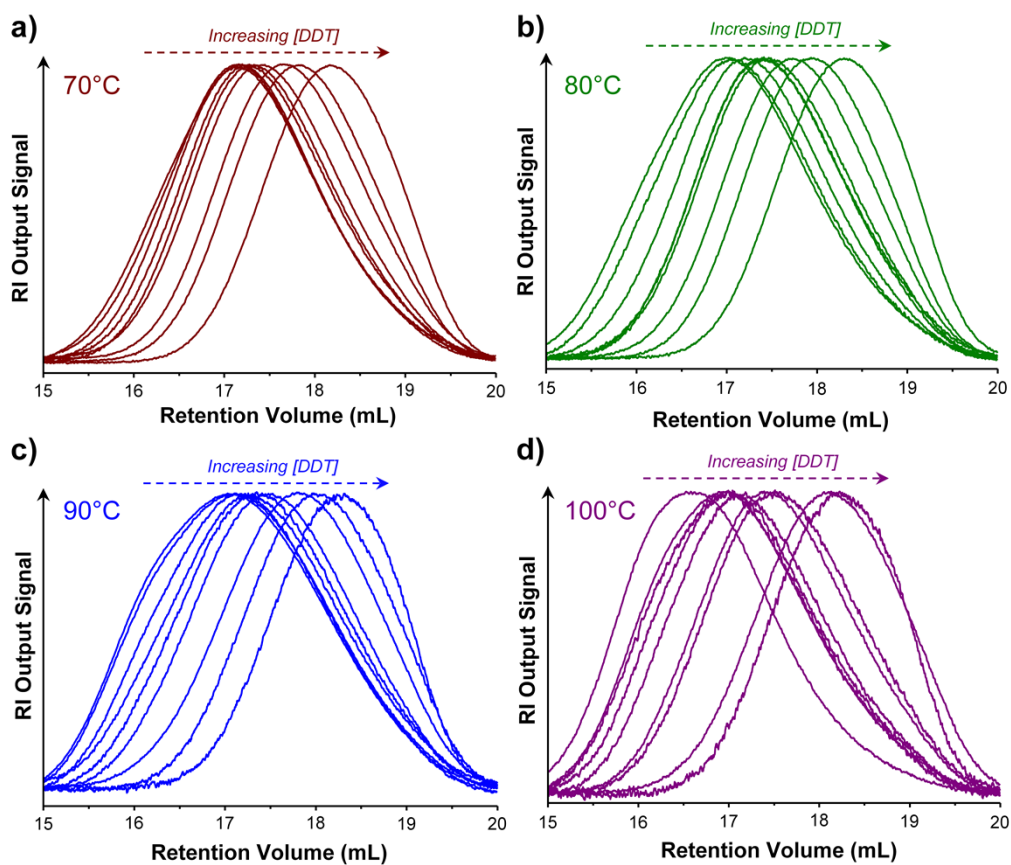

**Figure S4** The impact of  $[\text{DDT}]_0/[\text{EMA}]_0$  on the molecular weight distribution of  $p(\text{EMA})$ . Overlaid RI chromatograms obtained by TD-SEC of  $p(\text{EMA})$  generated at a)  $70^\circ\text{C}$ , b)  $80^\circ\text{C}$ , c)  $90^\circ\text{C}$  and d)  $100^\circ\text{C}$  using varied  $[\text{DDT}]_0/[\text{EMA}]_0$  ratios. In all cases, Mayo analyses were conducted using  $[\text{DDT}]_0/[\text{EMA}]_0$  ratios of 0.0067, 0.0050, 0.0040, 0.0033, 0.0029, 0.0025, 0.0025, 0.0022, 0.0020.



**Figure S5** The impact of temperature the chain transfer coefficient,  $C_T$ . a) Schematic representation of the CTA-mediated FRP of EMA. B) Mayo plots obtained at (i) 70 (red circles), (ii) 80 (green squares), (iii) 90 (blue diamonds) and (iv) 100 °C (purple triangles).

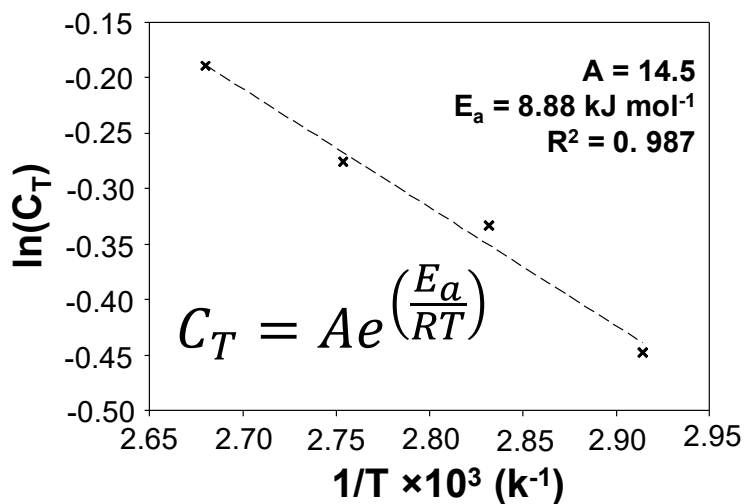

**Figure S6** The impact of temperature the chain transfer coefficient,  $C_T$ . An Arrhenius plot of  $\ln(C_T)$  vs.  $1/T$  using  $C_T$  values obtained for DDT at temperatures varying between 70 and 100 °C.

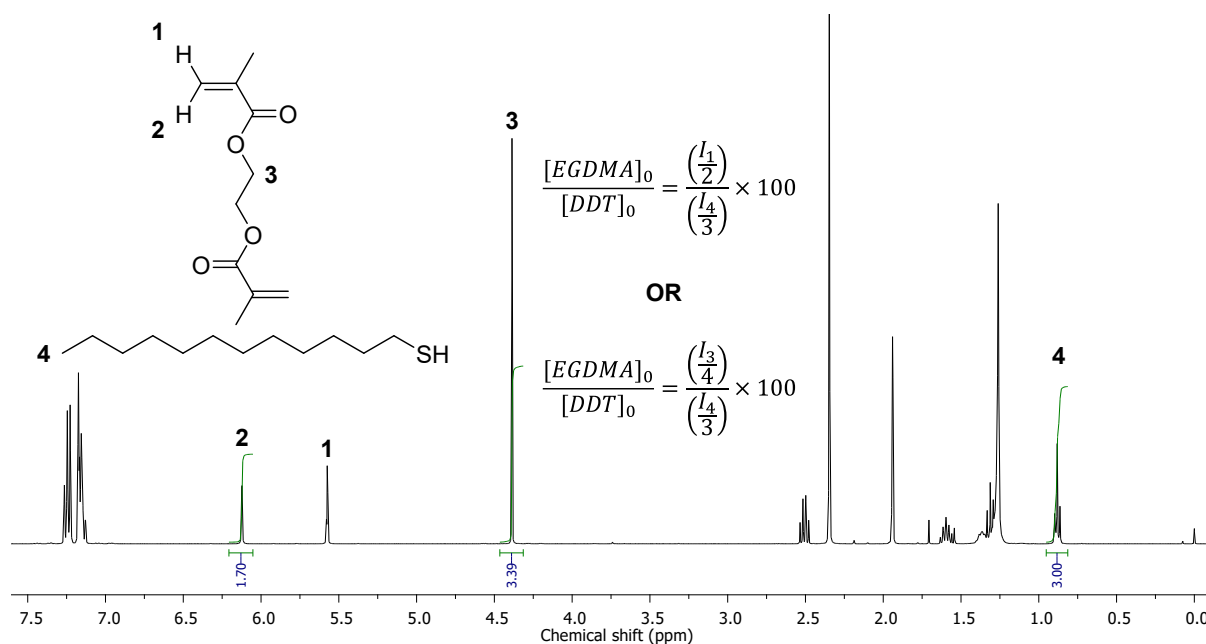

**Figure S7** Determination of  $[EGDMA]_0/[DDT]_0$ . Exemplary  $^1\text{H}$  NMR spectrum of a TBRT reaction mixture prior to initiation. The equations provided show how the intensities of EGDMA and DDT chemical shifts were used to determine the  $[EGDMA]_0/[DDT]_0$  ratio ( $[EGDMA]_0/[DDT]_0 = 0.85$ ).

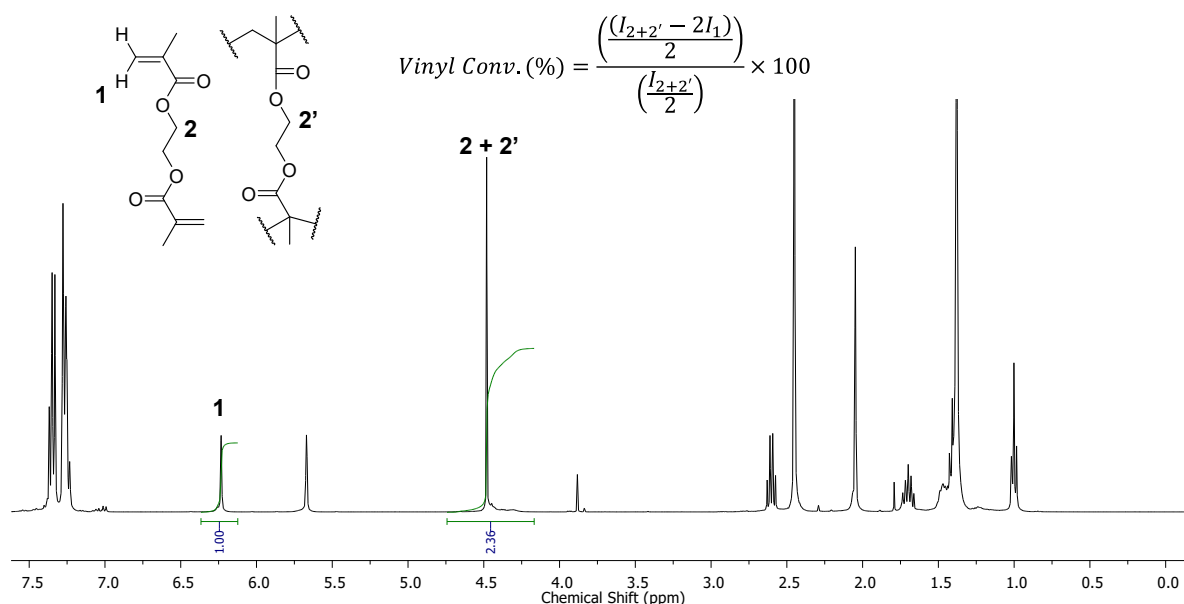

**Figure S8** Exemplary determination of vinyl group conversion *via*  $^1\text{H}$  NMR spectroscopy. The equation provided was used to determine vinyl group conversion (15%).

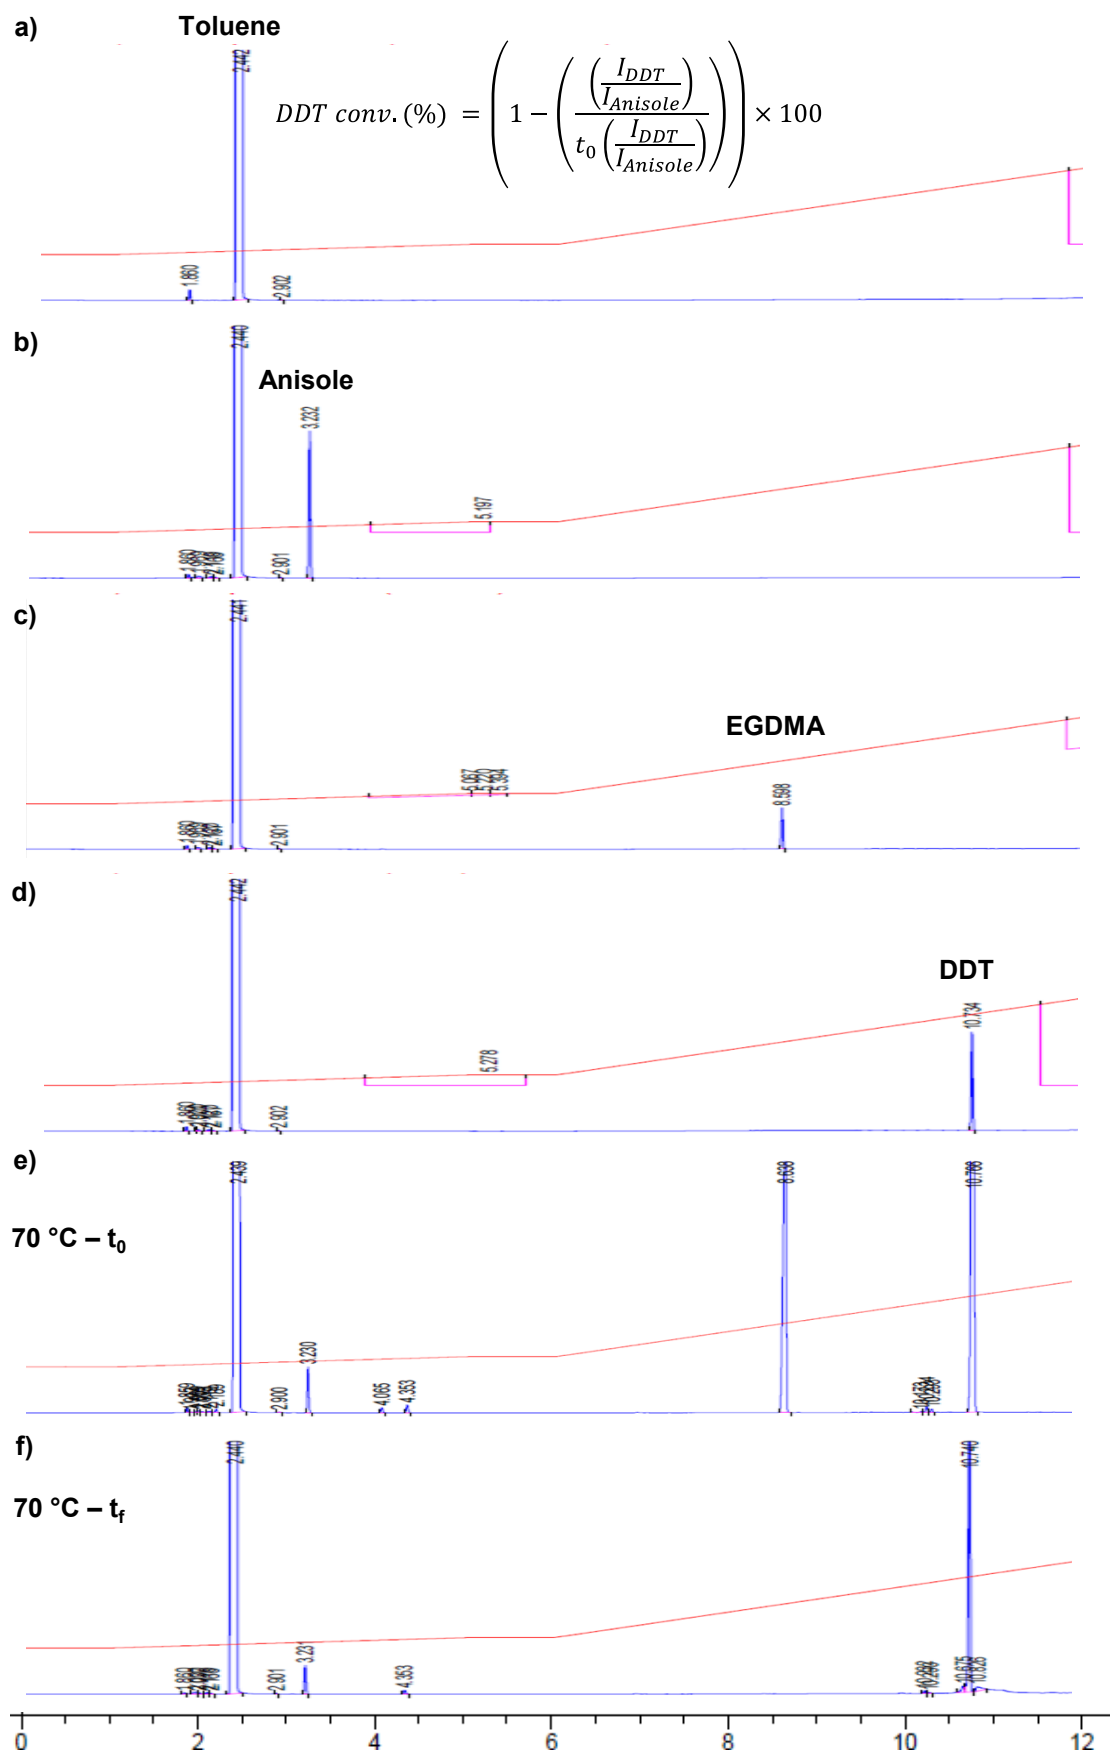

**Figure S9** Overlaid GC chromatograms obtained for a) toluene, b) anisole, c) EGDMA, d) EGDMA e) an exemplary TBRT reaction mixture prior to thermal initiation and e) and f) the same reaction mixture after 24 hours at 70 °C. The equation provided was used to determine both telogen and EGDMA conversion.

**Table S3** Kinetic data from the TBRT of EGDMA and DDT ( $[EGDMA]_0/[DDT]_0 = 0.85$ ) at 70 °C.

| Temp. (°C) | Time (mins) | <sup>1</sup> H NMR (CDCl <sub>3</sub> ) <sup>a</sup> |                         |          | GC <sup>b</sup> |                   |                                |
|------------|-------------|------------------------------------------------------|-------------------------|----------|-----------------|-------------------|--------------------------------|
|            |             | Vinyl conv. (%)                                      | ln[M] <sub>0</sub> /[M] | LOG(1-α) | EGDMA Conv. (%) | Telogen Conv. (%) | Log([Tel]/[Tel] <sub>0</sub> ) |
| 70°C       | 0           | 0                                                    | 0.000                   | 0.000    | 0               | 0                 | 0.000                          |
|            | 3           | 0                                                    | 0.000                   | 0.000    | 0               | 1                 | 0.006                          |
|            | 6           | 10                                                   | 0.109                   | 0.047    | 22              | 3                 | 0.013                          |
|            | 9           | 15                                                   | 0.166                   | 0.072    | 28              | 3                 | 0.015                          |
|            | 12          | 19                                                   | 0.203                   | 0.088    | 33              | 4                 | 0.017                          |
|            | 15          | 23                                                   | 0.263                   | 0.114    | 38              | 6                 | 0.029                          |
|            | 20          | 28                                                   | 0.333                   | 0.144    | 47              | 9                 | 0.040                          |
|            | 25          | 34                                                   | 0.409                   | 0.178    | 54              | 11                | 0.051                          |
|            | 30          | 38                                                   | 0.476                   | 0.207    | 61              | 14                | 0.063                          |
|            | 35          | 43                                                   | 0.562                   | 0.244    | 67              | 16                | 0.074                          |
|            | 40          | 48                                                   | 0.650                   | 0.282    | 73              | 19                | 0.090                          |
|            | 50          | 57                                                   | 0.846                   | 0.367    | 83              | 23                | 0.116                          |
|            | 60          | 66                                                   | 1.076                   | 0.467    | 90              | 28                | 0.145                          |
|            | 75          | 79                                                   | 1.551                   | 0.674    | 96              | 37                | 0.202                          |
|            | 90          | 89                                                   | 2.235                   | 0.971    | 99              | 44                | 0.257                          |
|            | 105         | 98                                                   | 3.922                   | 1.703    | <99             | 52                | 0.322                          |
| 120        | >99         | 6.908                                                | 3.000                   | <99      | 54              | 0.335             |                                |

<sup>a</sup> Determined by <sup>1</sup>H NMR analysis of the reaction mixture at the stated time intervals. <sup>b</sup> Determined by GC analysis of the reaction mixture at the stated time intervals.

**Table S4** Kinetic data from the TBRT of EGDMA and DDT ( $[EGDMA]_0/[DDT]_0 = 0.85$ ) at 80 °C.

| Temp. (°C) | Time (mins) | <sup>1</sup> H NMR (CDCl <sub>3</sub> ) <sup>a</sup> |                         |          | GC <sup>b</sup> |                   |                                |
|------------|-------------|------------------------------------------------------|-------------------------|----------|-----------------|-------------------|--------------------------------|
|            |             | Vinyl conv. (%)                                      | ln[M] <sub>0</sub> /[M] | LOG(1-α) | EGDMA Conv. (%) | Telogen Conv. (%) | Log([Tel]/[Tel] <sub>0</sub> ) |
| 80°C       | 0           | 0                                                    | 0.000                   | 0.000    | 0               | 0                 | 0.000                          |
|            | 3           | 5                                                    | 0.053                   | 0.023    | 15              | 0                 | 0.002                          |
|            | 6           | 14                                                   | 0.149                   | 0.064    | 23              | 1                 | 0.005                          |
|            | 9           | 21                                                   | 0.240                   | 0.104    | 34              | 6                 | 0.025                          |
|            | 12          | 26                                                   | 0.304                   | 0.132    | 45              | 10                | 0.045                          |
|            | 15          | 34                                                   | 0.422                   | 0.183    | 55              | 13                | 0.058                          |
|            | 20          | 46                                                   | 0.618                   | 0.268    | 70              | 19                | 0.092                          |
|            | 25          | 58                                                   | 0.877                   | 0.381    | 81              | 25                | 0.126                          |
|            | 30          | 68                                                   | 1.143                   | 0.496    | 89              | 31                | 0.164                          |
|            | 35          | 76                                                   | 1.423                   | 0.618    | 94              | 37                | 0.199                          |
|            | 40          | 83                                                   | 1.778                   | 0.772    | 98              | 41                | 0.230                          |
|            | 50          | 92                                                   | 2.513                   | 1.092    | <99             | 51                | 0.308                          |
|            | 60          | <99                                                  | 6.908                   | 3.000    | <99             | 56                | 0.357                          |
|            | 75          | <99                                                  | 6.908                   | 3.000    | <99             | 56                | 0.367                          |
|            | 90          | <99                                                  | 6.908                   | 3.000    | <99             | 56                | 0.364                          |
|            | 105         | <99                                                  | 6.908                   | 3.000    | <99             | 56                | 0.367                          |
| 120        | <99         | 6.908                                                | 3.000                   | <99      | 56              | 0.363             |                                |

<sup>a</sup> Determined by <sup>1</sup>H NMR analysis of the reaction mixture at the stated time intervals. <sup>b</sup> Determined by GC analysis of the reaction mixture at the stated time intervals.

**Table S5** Kinetic data from the TBRT of EGDMA and DDT ( $[\text{EGDMA}]_0/[\text{DDT}]_0 = 0.85$ ) at 90 °C.

| Temp. (°C) | Time (mins) | <sup>1</sup> H NMR (CDCl <sub>3</sub> ) <sup>a</sup> |                         |          | GC <sup>b</sup> |                   |                                |
|------------|-------------|------------------------------------------------------|-------------------------|----------|-----------------|-------------------|--------------------------------|
|            |             | Vinyl conv. (%)                                      | ln[M] <sub>0</sub> /[M] | LOG(1-α) | EGDMA Conv. (%) | Telogen Conv. (%) | Log([Tel]/[Tel] <sub>0</sub> ) |
| 90°C       | 0           | 0                                                    | 0.00                    | 0.000    | 0               | 0                 | 0.000                          |
|            | 3           | 7                                                    | 0.067                   | 0.029    | 11              | 0                 | 0.002                          |
|            | 6           | 19                                                   | 0.207                   | 0.090    | 36              | 7                 | 0.033                          |
|            | 9           | 38                                                   | 0.480                   | 0.208    | 63              | 15                | 0.069                          |
|            | 12          | 58                                                   | 0.872                   | 0.379    | 80              | 25                | 0.125                          |
|            | 15          | 72                                                   | 1.262                   | 0.548    | 92              | 35                | 0.184                          |
|            | 20          | 90                                                   | 2.273                   | 0.987    | 99              | 48                | 0.281                          |
|            | 25          | 99                                                   | 4.343                   | 1.886    | >99             | 57                | 0.365                          |
|            | 30          | >99                                                  | 6.908                   | 3.000    | >99             | 57                | 0.362                          |
|            | 35          | >99                                                  | 6.908                   | 3.00     | >99             | 57                | 0.362                          |
|            | 40          | >99                                                  | 6.908                   | 3.000    | >99             | 57                | 0.362                          |
|            | 50          | >99                                                  | 6.908                   | 3.000    | >99             | 57                | 0.362                          |
|            | 60          | >99                                                  | 6.908                   | 3.000    | >99             | 57                | 0.362                          |
|            | 75          | >99                                                  | 6.908                   | 3.000    | >99             | 57                | 0.362                          |
|            | 90          | >99                                                  | 6.908                   | 3.000    | >99             | 57                | 0.362                          |
|            | 105         | >99                                                  | 6.908                   | 3.000    | >99             | 57                | 0.362                          |
| 120        | >99         | 6.908                                                | 3.000                   | >99      | 57              | 0.362             |                                |

<sup>a</sup> Determined by <sup>1</sup>H NMR analysis of the reaction mixture at the stated time intervals. <sup>b</sup> Determined by GC analysis of the reaction mixture at the stated time intervals.

**Table S6** Kinetic data from the TBRT of EGDMA and DDT ( $[\text{EGDMA}]_0/[\text{DDT}]_0 = 0.85$ ) at 100 °C.

| Temp. (°C) | Time (mins) | <sup>1</sup> H NMR (CDCl <sub>3</sub> ) <sup>a</sup> |                         |          | GC <sup>b</sup> |                   |                                |
|------------|-------------|------------------------------------------------------|-------------------------|----------|-----------------|-------------------|--------------------------------|
|            |             | Vinyl conv. (%)                                      | ln[M] <sub>0</sub> /[M] | LOG(1-α) | EGDMA Conv. (%) | Telogen Conv. (%) | Log([Tel]/[Tel] <sub>0</sub> ) |
| 100°C      | 0           | 0                                                    | 0.00                    | 0.000    | 0               | 0                 | 0.000                          |
|            | 3           | 7                                                    | 0.072                   | 0.0315   | 9               | - <sup>c</sup>    | - <sup>c</sup>                 |
|            | 6           | 31                                                   | 0.365                   | 0.158    | 52              | 12                | 0.057                          |
|            | 9           | 79                                                   | 1.566                   | 0.680    | 93              | 37                | 0.204                          |
|            | 12          | 95                                                   | 2.976                   | 1.292    | >99             | 53                | 0.324                          |
|            | 15          | >99                                                  | 5.521                   | 2.398    | >99             | 57                | 0.368                          |
|            | 20          | >99                                                  | 6.908                   | 3.000    | >99             | 59                | 0.392                          |
|            | 25          | >99                                                  | 6.908                   | 3.000    | >99             | 59                | 0.392                          |
|            | 30          | >99                                                  | 6.908                   | 3.000    | >99             | 59                | 0.392                          |
|            | 35          | >99                                                  | 6.908                   | 3.000    | >99             | 59                | 0.392                          |
|            | 40          | >99                                                  | 6.908                   | 3.000    | >99             | 59                | 0.392                          |
|            | 50          | >99                                                  | 6.908                   | 3.000    | >99             | 59                | 0.392                          |
|            | 60          | >99                                                  | 6.908                   | 3.000    | >99             | 59                | 0.392                          |
|            | 75          | >99                                                  | 6.908                   | 3.000    | >99             | 59                | 0.392                          |
|            | 90          | >99                                                  | 6.908                   | 3.000    | >99             | 59                | 0.392                          |
|            | 105         | >99                                                  | 6.908                   | 3.000    | >99             | 59                | 0.392                          |
| 120        | >99         | 6.908                                                | 3.000                   | >99      | 59              | 0.392             |                                |

<sup>a</sup> Determined by <sup>1</sup>H NMR analysis of the reaction mixture at the stated time intervals. <sup>b</sup> Determined by GC analysis of the reaction mixture at the stated time intervals. <sup>c</sup> Reliable GC integrals could not be obtained for accurate determination of telogen conversion.

**Figure S10** Exemplary  $^1\text{H}$  NMR spectrum obtained from a TBRT reaction mixture after 24 hours. The equation provided was used to determine vinyl group conversion of  $>99\%$ .

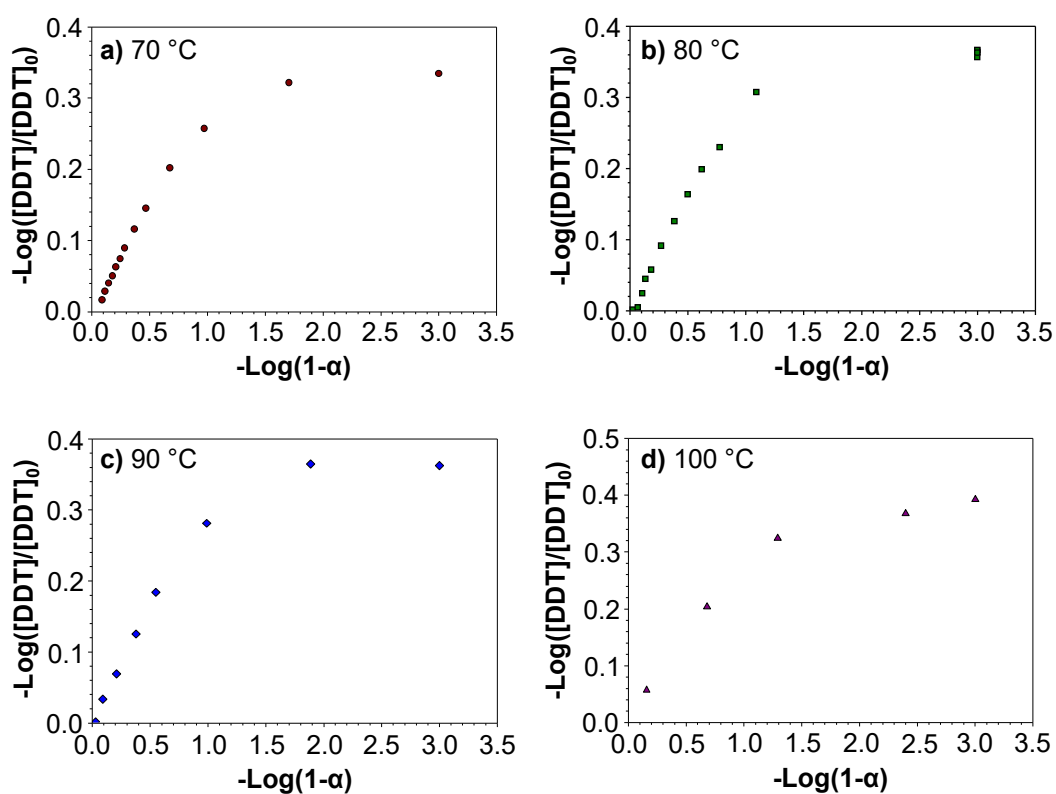

**Figure S11** Full plots of  $-\text{Log}([\text{Tel}]/[\text{Tel}]_0)$  against  $-\text{Log}(1-\alpha)$  obtained for TBRTs of EGDMA with DDT at a) 70, b) 80, c) 90 and d) 100 °C.

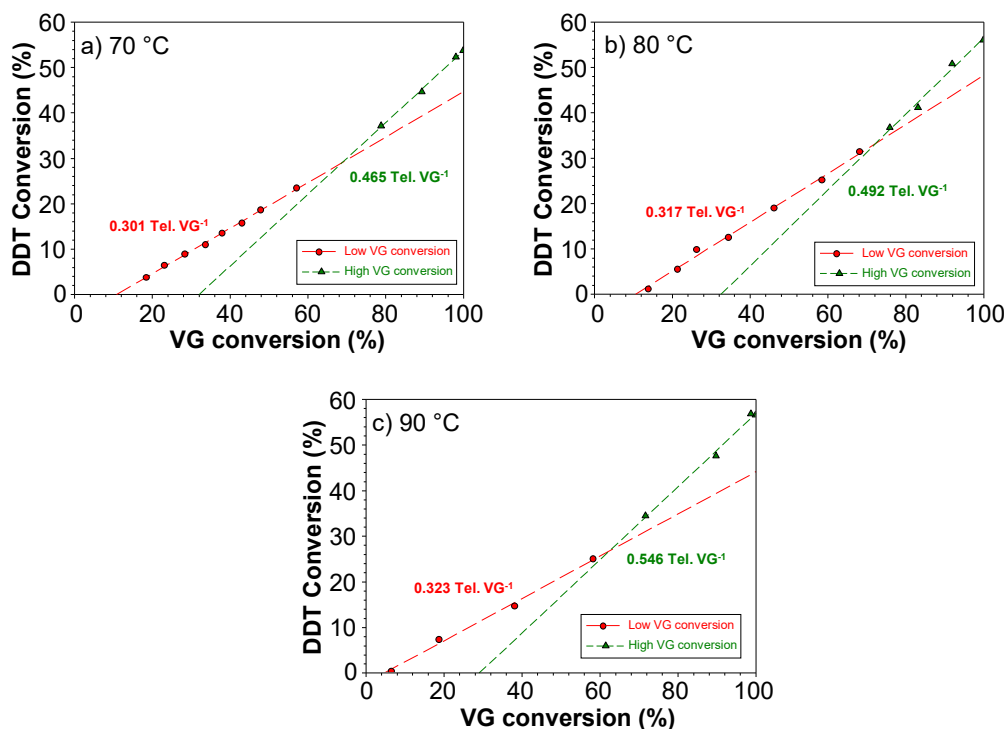

**Figure S12** Gradient analysis of vinyl group and telogen (Tel.) conversion plots to determine relative telogen consumption during the early (0-80, red circles) and latter (>80%, green triangles) stages of TBRT. Note:  $[EGDMA]_0/[DDT]_0 = 0.85$ .

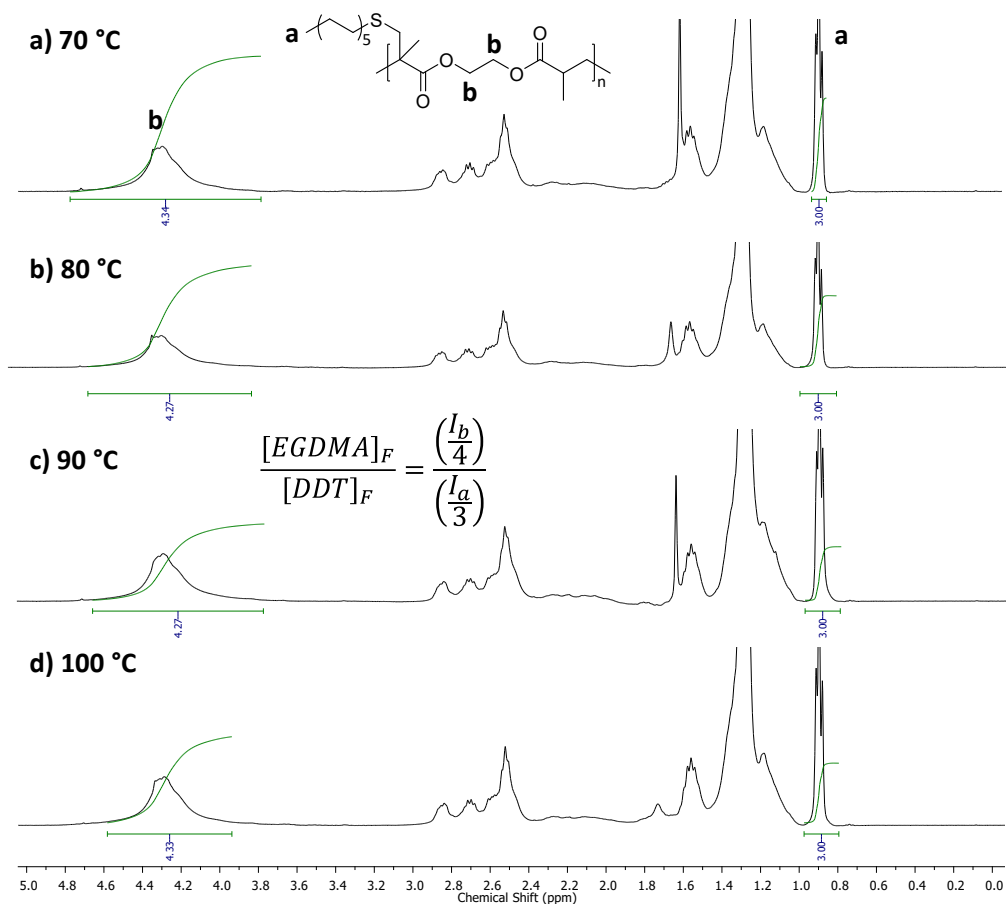

**Figure S13** Overlaid <sup>1</sup>H NMR spectra of the highest molecular weight *p*(DDT-EGDMA) generated at a) 70 °C, b) 80 °C, c) 90 °C and d) 100 °C.

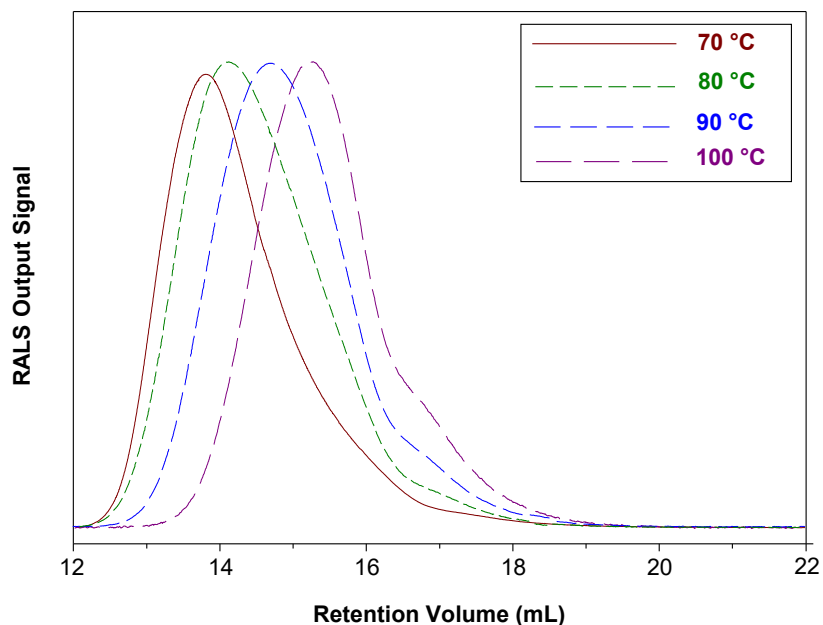

**Figure S14** Overlaid RALS chromatograms obtained for  $p(\text{DDT-EGDMA})$  generated *via* TBRT at 70°C (dark red solid line), 80°C (green short-dashed line), 90°C (blue medium-dashed line) and 100 °C (purple long-dashed line) using an  $[\text{EGDMA}]_0/[\text{DDT}]_0$  ratio of 0.85.

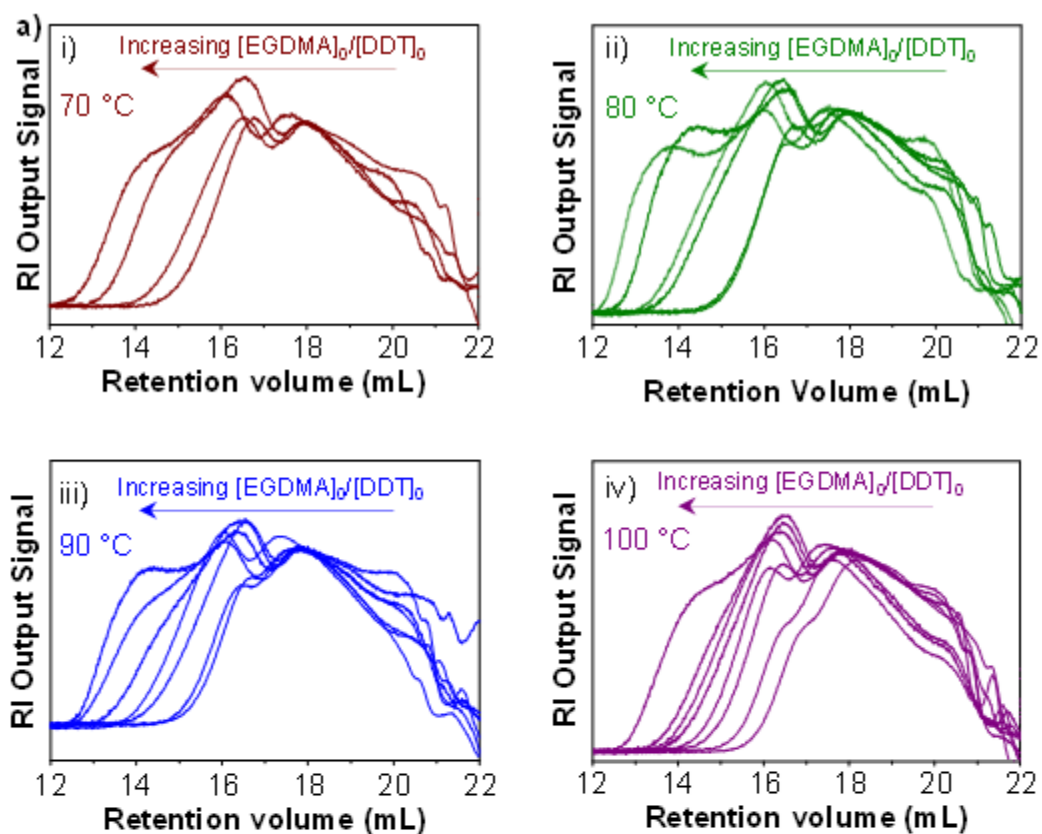

**Figure S15** Overlaid a) RI and b) RALS chromatograms obtained from TD-SEC analysis of  $p(\text{DDT-EGDMA})$  branched polymers generated at varied  $[\text{EGDMA}]_0/[\text{DDT}]_0$  ratios. i) 70°C (dark red,  $[\text{EGDMA}]_0/[\text{DDT}]_0$  ratios: 0.75, 0.80, 0.83 and 0.85.), ii) 80°C (green,  $[\text{EGDMA}]_0/[\text{DDT}]_0$  ratios: 0.75, 0.80, 0.83, 0.85, 0.88 and 0.90.), iii) 90°C (blue,  $[\text{EGDMA}]_0/[\text{DDT}]_0$  ratios: 0.75, 0.80, 0.83, 0.85, 0.88, 0.90 and 0.93.) and iv) 100 °C (purple,  $[\text{EGDMA}]_0/[\text{DDT}]_0$  ratios: 0.75, 0.80, 0.83, 0.85, 0.88, 0.90, 0.93 and 0.95).



**Figure S15 (cont.)** Overlaid a) RI and b) RALS chromatograms obtained from TD-SEC analysis of *p*(DDT-EGDMA) branched polymers generated at varied  $[\text{EGDMA}]_0/[\text{DDT}]_0$  ratios. i) 70°C (dark red,  $[\text{EGDMA}]_0/[\text{DDT}]_0$  ratios: 0.75, 0.80, 0.83 and 0.85.), ii) 80°C (green,  $[\text{EGDMA}]_0/[\text{DDT}]_0$  ratios: 0.75, 0.80, 0.83, 0.85, 0.88 and 0.90.), iii) 90°C (blue,  $[\text{EGDMA}]_0/[\text{DDT}]_0$  ratios: 0.75, 0.80, 0.83, 0.85, 0.88, 0.90 and 0.93.) and iv) 100 °C (purple,  $[\text{EGDMA}]_0/[\text{DDT}]_0$  ratios: 0.75, 0.80, 0.83, 0.85, 0.88, 0.90, 0.93 and 0.95).

**Figure S16** Overlaid DSC thermograms obtained from *p*(DDT-EGDMA) generated by TBRT at a) 70°C (dark red), b) 80°C (green), c) 90°C (blue) and d) 100 °C (purple).

#### **4. References**

[1] R. A. Gregg, D. M. Alderman and F. R. Mayo, *J. Am. Chem. Soc.*, 1948, **70**, 3740–3743.
